# Supplementary material
Source: Springer Nature journal article supplement (https://www.springermedizin.de/resource/supplementary/12889_2014_6800_MOESM3_ESM.pdf/9498952)

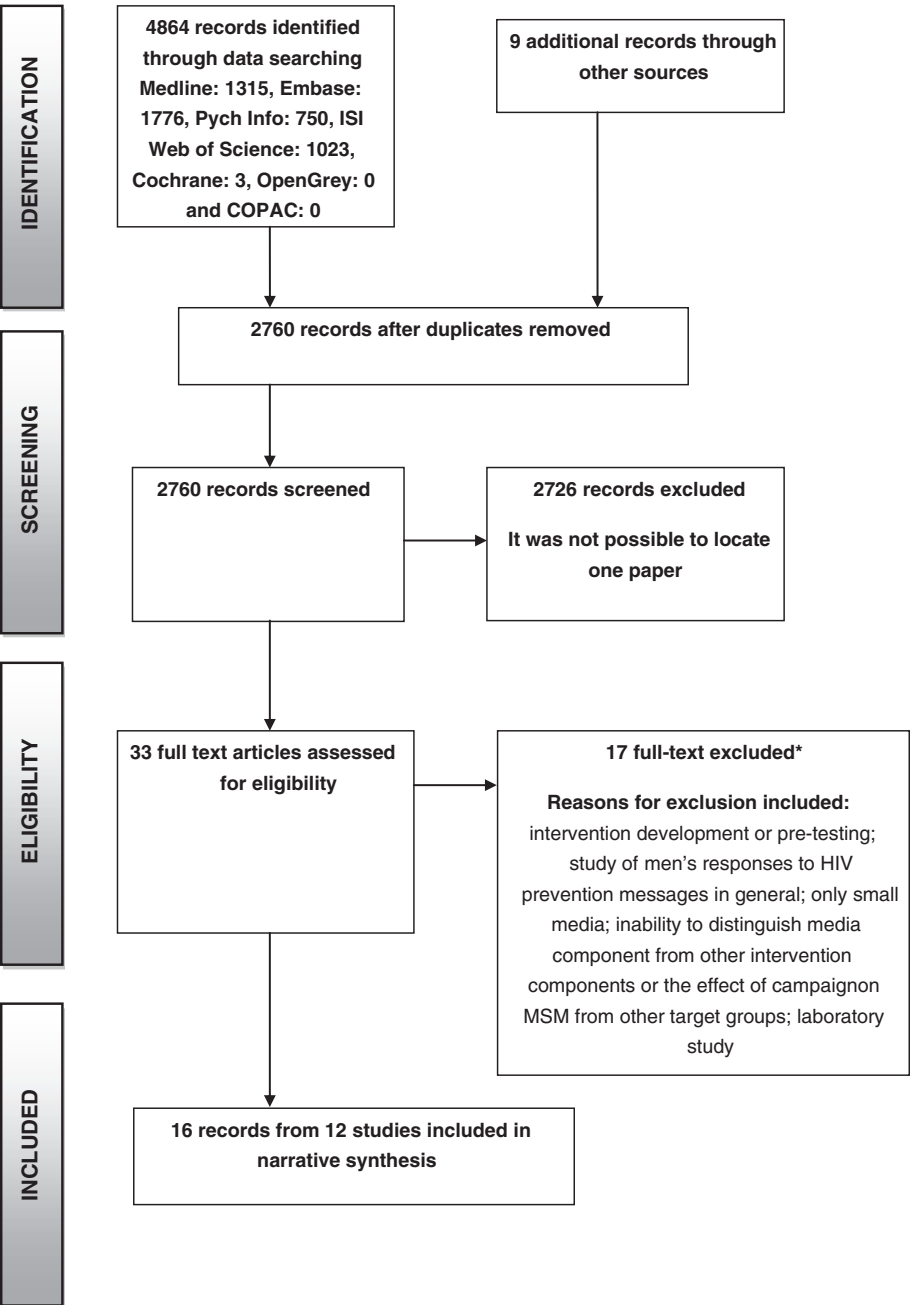

Supplement: MOESM3 [file 9498952]
